# Supplementary material for: A low cost and quasi-commercial polymer film chip for high-throughput inertial cell isolation
Source: Royal Society of Chemistry journal article supplement (doi:10.1039/c5ra27092h), 2016-01-01
Supplement: c5ra27092h1.pdf [file c5ra27092h1.pdf]

*Supplementary Material for:*

## A low cost and quasi-commercial polymer film chip for high-throughput inertial cell isolation

Xinjie Zhang, Di Huang, Wenlai Tang, Di Jiang, Ke Chen, Hong Yi, Nan Xiang,\* and

Zhonghua Ni\*

### Supplementary data

Table S1. Comparison of various rapid prototyping methods for fabricating microfluidic devices.

| <b>Fabrication methods</b> | <b>Materials</b>        | <b>Design-to-device time</b>                                       | <b>Advantages</b>                                            | <b>Disadvantages</b>                                                   |
|----------------------------|-------------------------|--------------------------------------------------------------------|--------------------------------------------------------------|------------------------------------------------------------------------|
| Soft lithography           | PDMS                    | ~ 24 h                                                             | Complex topography replication, high resolution              | Require clean room facility, need skilled technician, need master mold |
| Roll-to-roll embossing     | Polymers                | Several hours (mainly due to the fabrication time of master molds) | Continuous replication                                       | Need master mold                                                       |
| Injection molding          | Polymers, metals        | Several hours (mainly due to the fabrication time of master molds) | Mass production capability                                   | Need master mold                                                       |
| CNC machining              | Polymers, glass, metals | ~ 30 min                                                           | Flexible structure optimization                              | Rough surface, not suitable for mass production                        |
| Xurography                 | Soft polymers           | ~ 30 min                                                           | Flexible structure optimization                              | Rough surface, not suitable for mass production                        |
| 3D printing                | Thermoplastics (PLA)    | > 1 h                                                              | Flexible structure optimization                              | Low resolution, limited materials, not suitable for mass production    |
| Our work                   | Polymers                | < 20 min                                                           | Flexible structure optimization, batch production capability | Architecture limitation                                                |

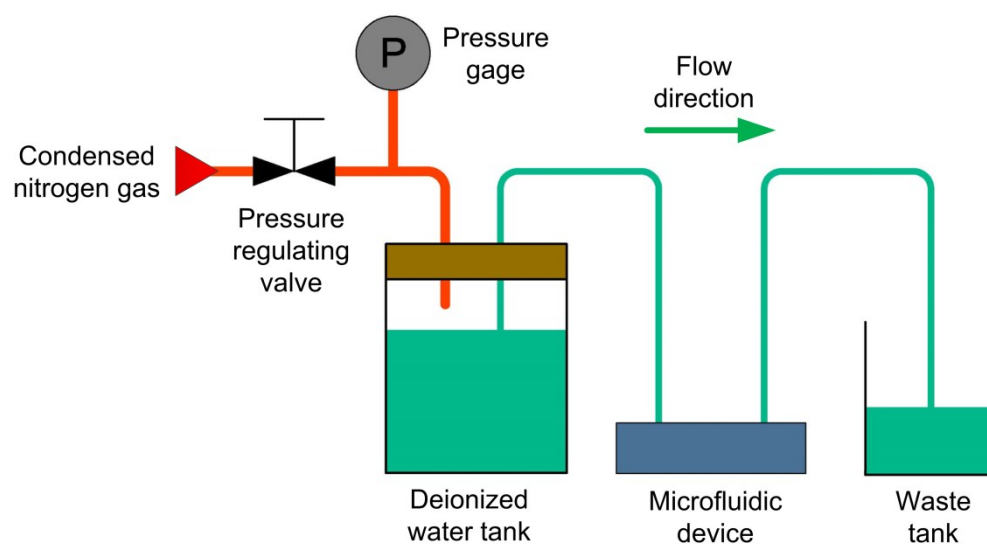

Fig. S1 Schematic diagram illustrating experimental setup for bond strength test of microfluidic devices.

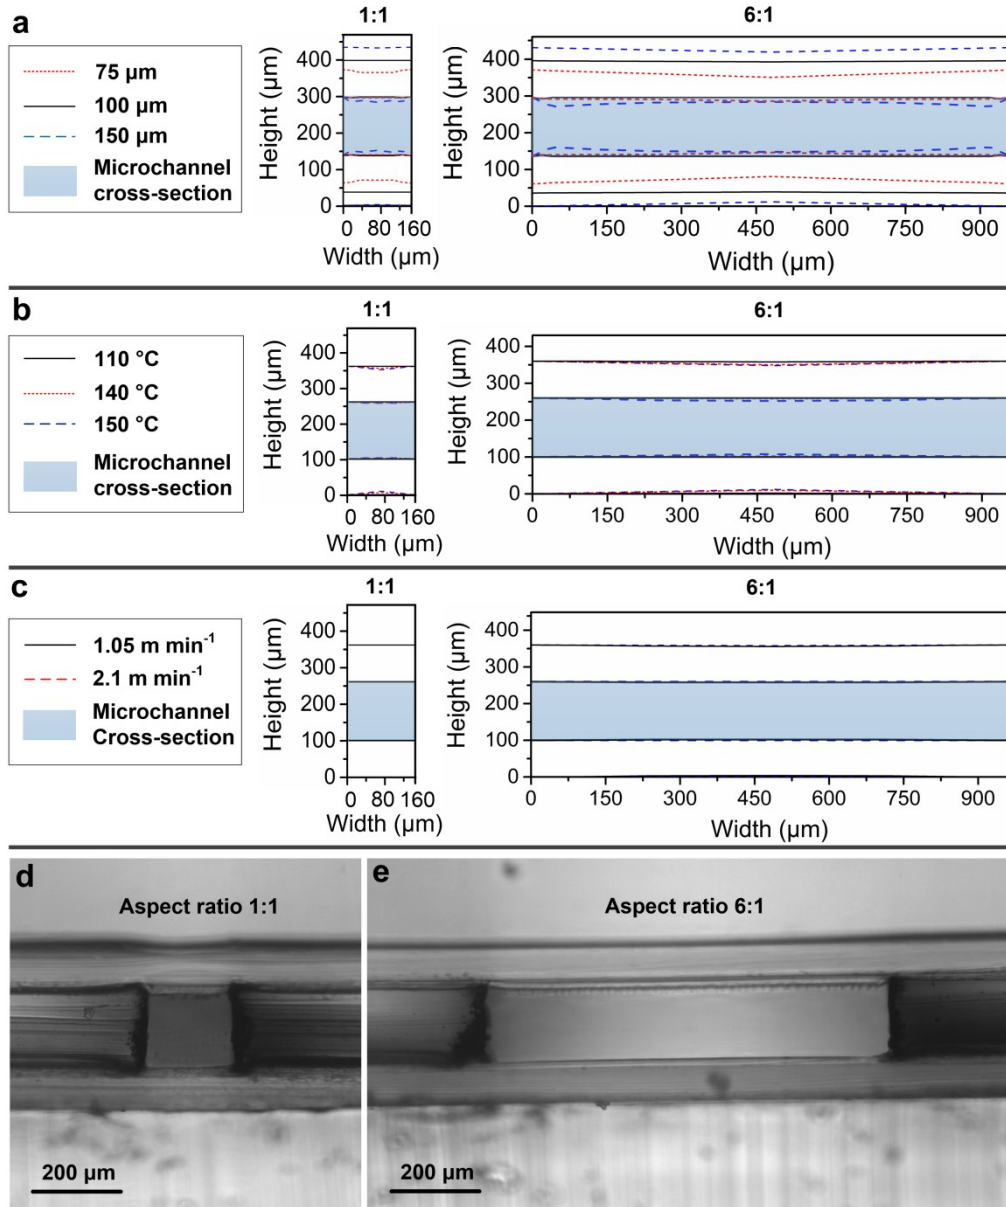

Fig. S2 Cross-sectional features of channels with aspect ratios of 1:1 and 6:1. (a) Comparisons of cross-sectional features under different laminating films; (b) Comparisons of cross-sectional features under different roller temperatures; (c) Comparison of cross-sectional features under different rolling speeds; (d-e) Captured cross-sectional image of channels with aspect ratios of 1:1 (d) and 6:1 (e) under the laminating process of using 100 μm thick laminating films, at a roller temperature of 120 °C and a rolling speed of 1.6 m min<sup>-1</sup>.

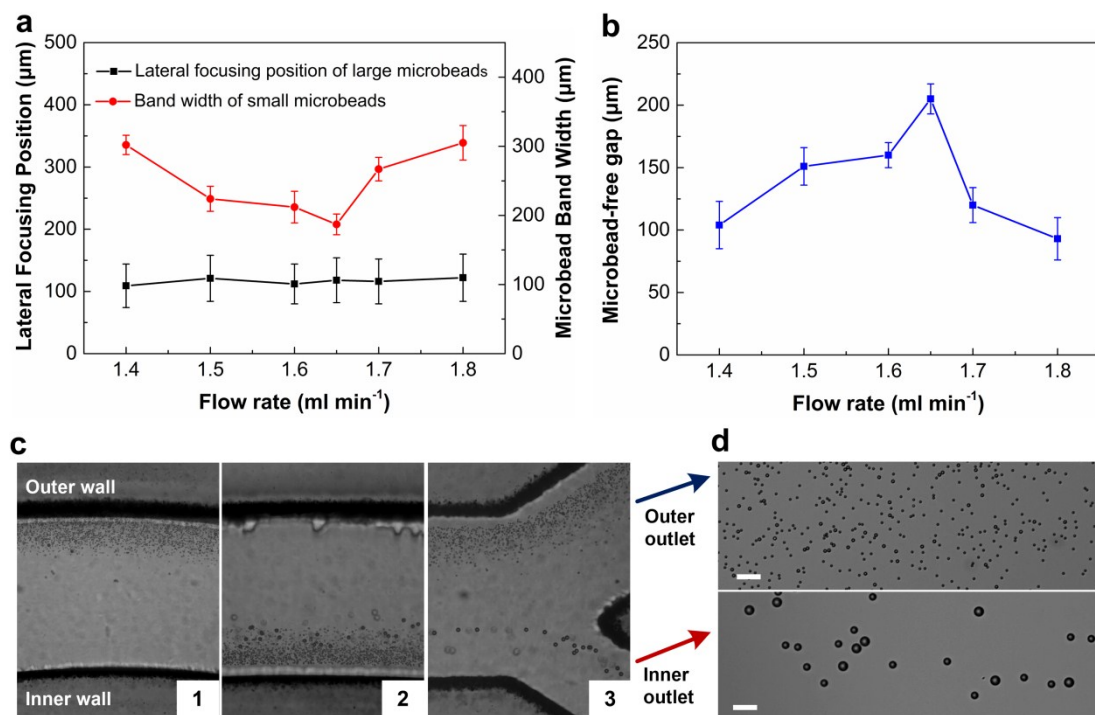

Fig. S3 Performance of microbead inertial isolation in our integrated device. (a) Quantitative analysis of lateral focusing position of large microbeads and band width of small microbeads versus total Dean flow rate; (b) Quantitative analysis of the gap between the large and small microbeads versus total Dean flow rate; (c) Composite images illustrating microbead dynamics at different positions (see the number marks in Fig. 5b) along the spiral channel under the optimal isolation flow rate; (d) Microscopic images illustrating collected samples from outer outlet and inner outlet.
